# Supplementary material
Source: Springer Nature journal article supplement (https://www.springermedizin.de/resource/supplementary/12911_2012_542_MOESM5_ESM.pdf/9526136)
Supplement: MOESM5 [file 9526136]

a)  $B_{II} \gg H_{II}$



b)  $B_{II} > H_{II}$



c)  $B_{II} = H_{II}$



d)  $B_{II} > H_{II}$
